# Supplementary material for: miR-17 deregulates a core RUNX1-miRNA mechanism of CBF acute myeloid leukemia
Source: PubMed Central journal article supplement (PMC4351976; doi:10.1186/s12943-014-0283-z), 2015-01-23
Supplement: 12943_2014_283_MOESM2_ESM.pdf [file 12943_2014_283_MOESM2_ESM.pdf]

**Supplementary Table S1. MicroRNAs predicted to target RUNX1 3' UTR (NM\_001001890 - 4334 nt) by TargetScan analysis**

| MicroRNA        | Position in RUNX1 3' UTR | predicted pairing of target region (top) and miRNA (bottom)         | seed match | context + score | context + score percentile | PCT   |
|-----------------|--------------------------|---------------------------------------------------------------------|------------|-----------------|----------------------------|-------|
| hsa-miR-27a     | 321-328                  | 5' ... GAUCCCGAGGGAAACUGUGAA ...<br>                                | 8mer       | -0.24           | 91                         | 0.9   |
|                 | 348-354                  | 3' CGCCUUGAAUCGGUGACACUU<br>5' ... UCUGAUUUAGCAAUGCUGUGAAU ...<br>  | 7mer-1A    | -0.13           | 73                         | 0.7   |
| hsa-miR-27b     | 321-328                  | 5' ... GAUCCCGAGGGAAACUGUGAA ...<br>                                | 8mer       | -0.23           | 90                         | 0.9   |
|                 | 348-354                  | 3' CGCCUUGAAUCGGUGACACUU<br>5' ... UCUGAUUUAGCAAUGCUGUGAAU ...<br>  | 7mer-1A    | -0.13           | 73                         | 0.7   |
| hsa-miR-128     | 321-327                  | 5' ... GAUCCCGAGGGAAACUGUGAA ...<br>                                | 7mer-1A    | -0.07           | 50                         | 0.79  |
| hsa-miR-9       | 408-414                  | 3' UUUCUCUGGCCAAGUGACACU<br>5' ... ACCAAGUUGUUUUUCCAAAGAG ...<br>   | 7mer-1A    | -0.06           | 54                         | 0.61  |
|                 | 498-505                  | 3' AGUAUGUCGAUCUAUUGUUUUU<br>5' ... AUUUUUUUUUUUUCCGCACCUA ...<br>  | 8mer       | -0.39           | 97                         | 0.78  |
| hsa-miR-18a     | 498-505                  | 3' UACAGAUUAAACU--CGUGGAAA<br>5' ... AUUUUUUUUUUUUCCGCACCUA ...<br> | 8mer       | -0.31           | 93                         | 0.78  |
|                 | 498-505                  | 3' GAUAGACGUGAUCUACGUGGAAU<br>5' ... AUUUUUUUUUUUUCCGCACCUA ...<br> | 8mer       | -0.3            | 92                         | 0.78  |
| hsa-miR-144     | 734-740                  | 5' ... UGGGUCAUUUUUAAACUACUGUAU ...<br>                             | 7mer-1A    | -0.04           | 37                         | 0.3   |
|                 | 3619-3626                | 3' UCAUGUAGUAGAU-AUGACAU<br>5' ... UCUUAGGUUUGCUAAAUCUGUA ...<br>   | 8mer       | -0.1            | 65                         | 0.43  |
| hsa-miR-101     | 734-740                  | 5' ... UGGGUCAUUUUUAAACUACUGUAU ...<br>                             | 7mer-1A    | -0.04           | 30                         | 0.3   |
|                 | 3620-3626                | 3' AAGUCAUAGUGUCAUGACAU<br>5' ... CUUAGGUUUGCUAAAUCUGUAG ...<br>    | 7mer-1A    | -0.04           | 28                         | 0.3   |
| hsa-miR-23a     | 926-932                  | 3' AAGUCAUAGUGUCAUGACAU<br>5' ... AAAAAAGAAUGAGUAUUGUGAU ...<br>    | 7mer-m8    | > -0.02         | 29                         | 0.2   |
|                 | 926-932                  | 3' CCUUUAGGGACCGUACACUA<br>5' ... AAAAAAGAAUGAGUAUUGUGAU ...<br>    | 7mer-m8    | > -0.02         | 29                         | 0.2   |
| hsa-miR-23b     | 926-932                  | 3' CCAUUAGGGACCGUACACUA<br>5' ... AAAAAAGAAUGAGUAUUGUGAU ...<br>    | 7mer-m8    | > -0.02         | 28                         | 0.2   |
|                 | 926-932                  | 3' CCCAUUAGGACCGUACACUA<br>5' ... AAAAAAGAAUGAGUAUUGUGAU ...<br>    | 7mer-m8    | > -0.02         | 28                         | 0.2   |
| hsa-miR-30a     | 955-962                  | 5' ... GUUAUCCAGAAGUAU-UGUUUACA ...<br>                             | 8mer       | -0.1            | 67                         | 0.92  |
|                 | 3365-3371                | 3' GAAGGUCAGCUCUACAAAUGU<br>5' ... AACAAAUGCCUUUUUGUUUACC ...<br>   | 7mer-m8    | > -0.02         | 28                         | 0.46  |
| hsa-miR-30b     | 955-962                  | 5' ... GUUAUCCAGAAGUAUUGUUUACA ...<br>                              | 8mer       | -0.09           | 63                         | 0.92  |
|                 | 3365-3371                | 3' UCGACUCACAUCUACAAAUGU<br>5' ... AACAAAUGCCUUUUUGUUUACC ...<br>   | 7mer-m8    | -0.02           | 35                         | 0.46  |
| hsa-miR-30c     | 955-962                  | 5' ... GUUAUCCAGAAGUAUUGUUUACA ...<br>                              | 8mer       | -0.09           | 63                         | 0.92  |
|                 | 3365-3371                | 3' CGACUCUCACAUCUACAAAUGU<br>5' ... AACAAAUGCCUUUUUGUUUACC ...<br>  | 7mer-m8    | -0.02           | 35                         | 0.46  |
| hsa-miR-30d     | 955-962                  | 5' ... GUUAUCCAGAAGUAU-UGUUUACA ...<br>                             | 8mer       | -0.1            | 67                         | 0.92  |
|                 | 3365-3371                | 3' GAAGGUCAGCCCUACAAAUGU<br>5' ... AACAAAUGCCUUUUUGUUUACC ...<br>   | 7mer-m8    | > -0.02         | 28                         | 0.46  |
| hsa-miR-30e     | 955-962                  | 5' ... GUUAUCCAGAAGUAU-UGUUUACA ...<br>                             | 8mer       | -0.1            | 66                         | 0.92  |
|                 | 3365-3371                | 3' GAAGGUCAGUCCUACAAAUGU<br>5' ... AACAAAUGCCUUUUUGUUUACC ...<br>   | 7mer-m8    | > -0.02         | 27                         | 0.46  |
| hsa-miR-761     | 1667-1673                | 5' ... ACUCAUAAUACUACUGCUGAU ...<br>                                | 7mer-1A    | -0.01           | 17                         | 0.49  |
|                 | 1667-1673                | 3' ACACAGUCAAGUGGGACGACG<br>5' ... ACUCAUAAUACUACUGCUGAU ...<br>    | 7mer-1A    | > -0.01         | 16                         | 0.49  |
| hsa-miR-214     | 1667-1673                | 3' UGACGGACAGACACGGACGACA<br>5' ... ACUCAUAAUACUACUGCUGAU ...<br>   | 7mer-1A    | > -0.01         | 15                         | 0.49  |
| hsa-miR-3619-5p | 1667-1673                | 5' ... ACUCAUAAUACUACUGCUGAU ...<br>                                | 7mer-1A    | > -0.01         | 15                         | 0.49  |
|                 | 1747-1753                | 3' CGACGUGGUCGGACGGACGACU<br>5' ... CGUUGAAACGAUUUCAGGUCAAC ...<br> | 7mer-1A    | -0.02           | 16                         | < 0.1 |
| hsa-miR-215     | 1747-1753                | 3' CAGACAGUUAAGUAUCCAGUA                                            |            |                 |                            |       |

|                 |           |    |                                      |         |         |    |       |
|-----------------|-----------|----|--------------------------------------|---------|---------|----|-------|
| hsa-miR-192     | 1747-1753 | 5' | ...CGUUGAAACGAUUUCAGGUCAAC...<br>    | 7mer-1A | -0.02   | 16 | < 0.1 |
|                 |           | 3' | CCGACAGUUAAGUAUCCAGUC                |         |         |    |       |
| hsa-miR-200a    | 1787-1793 | 5' | ...AGCAGGACUUCAGAAGAGUGUUU...<br>    | 7mer-m8 | -0.02   | 34 | 0.66  |
|                 |           | 3' | UGUAGCAAUGGUCUGUCACAAU               |         |         |    |       |
| hsa-miR-141     | 1787-1793 | 5' | ...AGCAGGACUUCAGAAGAGUGUUU...<br>    | 7mer-m8 | -0.02   | 33 | 0.66  |
|                 |           | 3' | GGUAGAAAUGGUCUGUCACAAU               |         |         |    |       |
| hsa-miR-217     | 1929-1936 | 5' | ...AUUUGUUUUACACACAUAGCAGUA...<br>   | 8mer    | > -0.03 | 6  | 0.41  |
|                 |           | 3' | AGGUUAGUCAAGGACUACGUCAU              |         |         |    |       |
| hsa-miR-302a    | 1936-1942 | 5' | ...UUACACACAUGCAGUAGCACUUU...<br>    | 7mer-m8 | -0.02   | 39 | 0.84  |
|                 |           | 3' | AGUGUUUUUGUACCU--UCGUGAAU            |         |         |    |       |
| hsa-miR-302b    | 1936-1942 | 5' | ...UUACACACAUGCAGUAGCACUUU...<br>    | 7mer-m8 | -0.02   | 39 | 0.84  |
|                 |           | 3' | GAUGAUUUUGUACCU--UCGUGAAU            |         |         |    |       |
| hsa-miR-302c    | 1936-1942 | 5' | ...UUACACACAUGCAGUAGCACUUU...<br>    | 7mer-m8 | -0.02   | 39 | 0.84  |
|                 |           | 3' | GGUGACUUUGUACCU--UCGUGAAU            |         |         |    |       |
| hsa-miR-302d    | 1936-1942 | 5' | ...UUACACACAUGCAGUAGCACUUU...<br>    | 7mer-m8 | -0.02   | 39 | 0.84  |
|                 |           | 3' | UGUGAGUUUGUACCU--UCGUGAAU            |         |         |    |       |
| hsa-miR-302e    | 1936-1942 | 5' | ...UUACACACAUGCAGUAGCACUUU...<br>    | 7mer-m8 | > -0.02 | 34 | 0.84  |
|                 |           | 3' | UUCGUACCU--UCGUGAAU                  |         |         |    |       |
| hsa-miR-372     | 1936-1942 | 5' | ...UUACACACAUGCAGUAGCACUUU...<br>    | 7mer-m8 | > -0.02 | 30 | 0.84  |
|                 |           | 3' | UGCAGUUUACAGCUCUGUGAAA               |         |         |    |       |
| hsa-miR-520a-3p | 1936-1942 | 5' | ...UUACACACAUGCAGUAGCACUUU...<br>    | 7mer-m8 | > -0.02 | 27 | 0.84  |
|                 |           | 3' | UGUCAGGUUCCUUCGUGAAA                 |         |         |    |       |
| hsa-miR-520e    | 1936-1942 | 5' | ...UUACACACAUGCAGUAGCACUUU...<br>    | 7mer-m8 | > -0.02 | 25 | 0.84  |
|                 |           | 3' | GGGAGUUUUCCUUCGUGAAA                 |         |         |    |       |
| hsa-miR-373     | 1936-1942 | 5' | ...UUACACACAUGCAGUAGCACUUU...<br>    | 7mer-m8 | > -0.02 | 25 | 0.84  |
|                 |           | 3' | UGUGGGUUUUAGCUUCGUGAAG               |         |         |    |       |
| hsa-miR-520b    | 1936-1942 | 5' | ...UUACACACAUGCAGUAGCACUUU...<br>    | 7mer-m8 | > -0.02 | 20 | 0.84  |
|                 |           | 3' | GGGAGAUUUCCUUCGUGAAA                 |         |         |    |       |
| hsa-miR-520c-3p | 1936-1942 | 5' | ...UUACACACAUGCAGUAGCACUUU...<br>    | 7mer-m8 | > -0.02 | 20 | 0.84  |
|                 |           | 3' | UGGGAGAUUUCCUUCGUGAAA                |         |         |    |       |
| hsa-miR-20a     | 1937-1943 | 5' | ...UACACACAUGCAGUAGCACUUUG...<br>    | 7mer-m8 | > -0.02 | 28 | 0.9   |
|                 |           | 3' | GAUGGACGUGAUUUUCGUGAAA               |         |         |    |       |
| hsa-miR-520d-3p | 1936-1942 | 5' | ...UUACACACAUGCAGUAGCACUUU...<br>    | 7mer-m8 | > -0.02 | 26 | 0.84  |
|                 |           | 3' | UGGGUGGUUUCUCUUCGUGAAA               |         |         |    |       |
| hsa-miR-106b    | 1937-1943 | 5' | ...UACACACAUGCAGUAGCACUUUG...<br>    | 7mer-m8 | > -0.02 | 28 | 0.9   |
|                 |           | 3' | UAGACGUGACAGUCGUGAAA                 |         |         |    |       |
| hsa-miR-93      | 1937-1943 | 5' | ...UACACACAUGCAGUAGCACUUUG...<br>    | 7mer-m8 | > -0.02 | 28 | 0.9   |
|                 |           | 3' | GAUGGACGUGCUUGUCGUGAAAC              |         |         |    |       |
| hsa-miR-20b     | 1937-1943 | 5' | ...UACACACAUGCAGUAGCACUUUG...<br>    | 7mer-m8 | > -0.02 | 28 | 0.9   |
|                 |           | 3' | GAUGGACGUGAUACUCGUGAAAC              |         |         |    |       |
| hsa-miR-17      | 1937-1943 | 5' | ...UACACACAUGCAGUAGCACUUUG...<br>    | 7mer-m8 | > -0.02 | 27 | 0.9   |
|                 |           | 3' | GAUGGACGUGACAUUCGUGAAAC              |         |         |    |       |
| hsa-miR-106a    | 1937-1943 | 5' | ...UACACACAUGCAGUAGCACUUUG...<br>    | 7mer-m8 | > -0.02 | 27 | 0.9   |
|                 |           | 3' | GAUGGACGUGACAUUCGUGAAA               |         |         |    |       |
| hsa-miR-519d    | 1937-1943 | 5' | ...UACACACAUGCAGUAGCACUUUG...<br>    | 7mer-m8 | > -0.02 | 24 | 0.9   |
|                 |           | 3' | GUGAGAUUUCCUUCGUGAAAC                |         |         |    |       |
| hsa-miR-135a    | 2688-2694 | 5' | ...GGAGAAGUAUUGAAU---AAGCCAUU...<br> | 7mer-m8 | -0.06   | 31 | 0.52  |
|                 |           | 3' | AGUGUAUCUUUAUUUUUCGGUAU              |         |         |    |       |
| hsa-miR-135b    | 2688-2694 | 5' | ...GGAGAAGUAUUGAAU---AAGCCAUU...<br> | 7mer-m8 | -0.06   | 31 | 0.52  |
|                 |           | 3' | AGUGUAUCUUUAUUUUUCGGUAU              |         |         |    |       |
| hsa-miR-1       | 3228-3234 | 5' | ...ACCUGUUUCUUUGGACAUUCCG...<br>     | 7mer-m8 | > -0.02 | 23 | 0.42  |
|                 |           | 3' | UAUGUAUGAAGAAA--UGUAAGGU             |         |         |    |       |
| hsa-miR-206     | 3228-3234 | 5' | ...ACCUGUUUCUUUGGACAUUCCG...<br>     | 7mer-m8 | > -0.02 | 20 | 0.42  |
|                 |           | 3' | GGUGUGAAGGAUGUAAGGU                  |         |         |    |       |
| hsa-miR-613     | 3228-3234 | 5' | ...ACCUGUUUCUUUGGACAUUCCG...<br>     | 7mer-m8 | > -0.02 | 11 | 0.42  |
|                 |           | 3' | CCGUUUUCUUCCUUGUAAGGA                |         |         |    |       |
| hsa-miR-184     | 3232-3238 | 5' | ...GUUUUUUUGGACAUUCCGUCU...<br>      | 7mer-m8 | -0.22   | 58 | 0.33  |
|                 |           | 3' | UGGAAUAGUCAAGAGGCAGGU                |         |         |    |       |
| hsa-miR-429     | 3436-3442 | 5' | ...UGUUUUUAGCCAGGUCAGUAUUG...<br>    | 7mer-m8 | -0.02   | 45 | 0.47  |
|                 |           | 3' | UGCCAAAUGGUCU--GUCAUAAU              |         |         |    |       |
| hsa-miR-200c    | 3436-3442 | 5' | ...UGUUUUUAGCCAGGUCAGUAUUG...<br>    | 7mer-m8 | > -0.02 | 38 | 0.47  |
|                 |           | 3' | AGGUAGUAAUGGCC--GUCAUAAU             |         |         |    |       |
| hsa-miR-200b    | 3436-3442 | 5' | ...UGUUUUUAGCCAGGUCAGUAUUG...<br>    | 7mer-m8 | > -0.02 | 38 | 0.47  |

|                |           |                                                                |         |       |    |       |
|----------------|-----------|----------------------------------------------------------------|---------|-------|----|-------|
| hsa-miR-383    | 3450-3456 | 3' AGUAGUAAUGGUCC-GUCAUAAU<br>5' ...UCAGUAUUAGAGGCGUAUCAU...   | 7mer-1A | -0.05 | 30 | < 0.1 |
| hsa-miR-139-5p | 3621-3627 | 3' UCGGUGUUAGUGGAAGACUAGA<br>5' ...UUAGGUUUGCUGAAUACUGUAGG...  | 7mer-m8 | -0.12 | 68 | 0.17  |
| hsa-miR-129-5p | 3765-3772 | 3' GACCUCUGUGCACGUGACAUCU<br>5' ...AGGGGAAAUGAAUGUGCAAAAA...   | 8mer    | -0.06 | 88 | < 0.1 |
| hsa-miR-4262   | 3758-3764 | 3' CGUUCGGGUCUGGCGUUUUUC<br>5' ...UUGUUCUAGGGGAAAUGAAUGUG...   | 7mer-m8 | -0.1  | 72 | 0.77  |
| hsa-miR-181a   | 3758-3764 | 3' GUCCAUCAGACUACAG<br>5' ...UUGUUCUAGGGGAAAUGAAUGUG...        | 7mer-m8 | -0.06 | 57 | 0.77  |
| hsa-miR-181b   | 3758-3764 | 3' UGAGUGGCUGUCGCAACUUACAA<br>5' ...UUGUUCUAGGGGAAAUGAAUGUG... | 7mer-m8 | -0.06 | 57 | 0.77  |
| hsa-miR-181c   | 3758-3764 | 3' UGGGUGGCUGUCGUACUUACAA<br>5' ...UUGUUCUAGGGGAAAUGAAUGUG...  | 7mer-m8 | -0.07 | 61 | 0.77  |
| hsa-miR-181d   | 3758-3764 | 3' UGAGUGGCUGUCCAACUUACAA<br>5' ...UUGUUCUAGGGGAAAUGAAUGUG...  | 7mer-m8 | -0.07 | 61 | 0.77  |

Targets can analysis - release 6.2 (June 2012) - showing only sites conserved among vertebrates

TOT miRNA = 60
