# Supplementary material for: miR-17 deregulates a core RUNX1-miRNA mechanism of CBF acute myeloid leukemia
Source: PubMed Central journal article supplement (PMC4351976; doi:10.1186/s12943-014-0283-z), 2015-01-23
Supplement: 12943_2014_283_MOESM3_ESM.pdf [file 12943_2014_283_MOESM3_ESM.pdf]

Supplementary Table S2. MicroRNAs predicted to target KIT 3' UTR (NM\_001093772 - 2158 nt) by TargetScan analysis

| MicroRNA        | Position in KIT 3'UTR | predicted pairing of target region (top) and miRNA (bottom)                    | seed match | context + score | context + score percentile | PCT   | Validated Kit-targeting? | Validated RUNX1-target? |
|-----------------|-----------------------|--------------------------------------------------------------------------------|------------|-----------------|----------------------------|-------|--------------------------|-------------------------|
| hsa-miR-218     | 844-850               | 5' ...AACAAUUAUACCACAAGCACAG...<br>     <br>3' UGUACCAAUCUAGUUCGUGUU           | 7mer-m8    | -0.1            | 53                         | 0.42  |                          |                         |
| hsa-miR-193a-3p | 1088-1095             | 5' ...AUGUCCUGGACACCG--GGCCAGUA...<br>         <br>3' UGACCCUGAACAUCGGUCUA     | 8mer       | -0.22           | 72                         | 0.54  | YES<br>PMID:21399664     | YES<br>PMID:23223432    |
| hsa-miR-193b    | 1088-1095             | 5' ...AUGUCCUGGACACCG--GGCCAGUA...<br>         <br>3' UCGCCUGAACAUCGGUCUA      | 8mer       | -0.22           | 72                         | 0.54  | YES<br>PMID:21724256     |                         |
| hsa-miR-19b     | 1648-1654             | 5' ...AUCUGGAAGUAAACCAUUUGCACU...<br>     <br>3' AGUCAAAACGUACCUAACGUGU        | 7mer-m8    | -0.07           | 39                         | 0.83  |                          | YES<br>PMID:17589498    |
| hsa-miR-19a     | 1648-1654             | 5' ...AUCUGGAAGUAAACCAUUUGCACU...<br>     <br>3' AGUCAAAACGUAAUUAACGUGU        | 7mer-m8    | -0.07           | 39                         | 0.83  | YES<br>PMID:21880628     | YES<br>PMID:17589498    |
| hsa-miR-152     | 1650-1656             | 5' ...CUGGAAGUAAACCAUUUGCACUG...<br>     <br>3' GGUUCAAGACACGACGUGACU          | 7mer-m8    | -0.18           | 72                         | 0.72  |                          |                         |
| hsa-miR-148b    | 1650-1656             | 5' ...CUGGAAGUAAACCAUUUGCACUG...<br>     <br>3' UGUUUCAAGACACUACGUGACU         | 7mer-m8    | -0.18           | 72                         | 0.72  |                          |                         |
| hsa-miR-148a    | 1650-1656             | 5' ...CUGGAAGUAAACCAUUUGCACUG...<br>     <br>3' UGUUUCAAGACACUACGUGACU         | 7mer-m8    | -0.18           | 71                         | 0.72  |                          |                         |
| hsa-miR-4295    | 1649-1655             | 5' ...UCUGGAAGUAAACCAUUUGCACUG...<br>         <br>3' UUCCUUUGU---AACGUGAC      | 7mer-m8    | -0.13           | 59                         | 0.8   |                          |                         |
| hsa-miR-454     | 1649-1655             | 5' ...UCUGGAAGUAAACCAUUUGCACUG...<br>         <br>3' UGGGAUAUUCGUUAU--AACGUGAU | 7mer-m8    | -0.13           | 57                         | 0.8   |                          |                         |
| hsa-miR-130a    | 1649-1655             | 5' ...UCUGGAAGUAAACCAUUUGCACUG...<br>     <br>3' UACGGGAAAAUUGUAACGUGAC        | 7mer-m8    | -0.12           | 53                         | 0.8   |                          |                         |
| hsa-miR-301b    | 1649-1655             | 5' ...UCUGGAAGUAAACCAUUUGCACUG...<br>     <br>3' CGAACUGUUAUAGUAACGUGAC        | 7mer-m8    | -0.11           | 50                         | 0.8   |                          |                         |
| hsa-miR-301a    | 1649-1655             | 5' ...UCUGGAAGUAAACCAUUUGCACUG...<br>     <br>3' CGAACUGUUAUAGUAACGUGAC        | 7mer-m8    | -0.11           | 49                         | 0.8   |                          |                         |
| hsa-miR-130b    | 1649-1655             | 5' ...UCUGGAAGUAAACCAUUUGCACUG...<br>     <br>3' UACGGGAAAGUAAACGUGAC          | 7mer-m8    | -0.11           | 49                         | 0.8   |                          |                         |
| hsa-miR-3666    | 1649-1655             | 5' ...UCUGGAAGUAAACCAUUUGCACUG...<br>     <br>3' AGCCGUAGAUGCUGAACGUGAC        | 7mer-m8    | -0.1            | 45                         | 0.8   |                          |                         |
| hsa-miR-4735-3p | 1672-1678             | 5' ...GAGUUCUAUGCUCUCGCACCUU...<br>         <br>3' UACAGAUAAACU--CGUGGAAA      | 7mer-m8    | -0.16           | 71                         | 0.66  |                          |                         |
| hsa-miR-18a     | 1672-1678             | 5' ...GAGUUCUAUGCUCUCGCACCUU...<br>     <br>3' GAUAGACGUGAUUCACGUGGAAU         | 7mer-m8    | -0.15           | 64                         | 0.66  |                          | YES<br>PMID:17589498    |
| hsa-miR-18b     | 1672-1678             | 5' ...GAGUUCUAUGCUCUCGCACCUU...<br>     <br>3' GAUAGACGUGAUUCACGUGGAAU         | 7mer-m8    | -0.15           | 64                         | 0.66  |                          | YES<br>PMID:17589498    |
| hsa-miR-199a-5p | 1652-1658             | 5' ...GGAAGUAAACCAUUUGCACUGGAG...<br>     <br>3' CUUGUCAUCAGACUUGUGACCC        | 7mer-1A    | -0.12           | 53                         | 0.62  |                          |                         |
| hsa-miR-199b-5p | 1652-1658             | 5' ...GGAAGUAAACCAUUUGCACUGGAG...<br>     <br>3' CUUGUCUAUCAGAUUUGUGACCC       | 7mer-1A    | -0.11           | 52                         | 0.62  |                          |                         |
| hsa-miR-222     | 1030-1037             | 5' ...UUAGUUUGGAUUUCUUAUGUAGCA...<br>     <br>3' UGGGUCAUCGGUUCACAUUGCA        | 8mer       | -0.13           | 57                         | < 0.1 | YES<br>PMID:16330772     | YES<br>PMID:21076613    |
| hsa-miR-221     | 1030-1037             | 5' ...UUAGUUUGGAUUUCUUAUGUAGCA...<br>     <br>3' CUUUGGGUCGUCUGUACAUUGCA       | 8mer       | -0.11           | 49                         | < 0.1 | YES<br>PMID:16330772     | YES<br>PMID:21076613    |
| hsa-miR-137     | 1963-1970             | 5' ...UAAAUUUGAAUUGAGCAAAUA...<br>         <br>3' GAUGCGCAUAGAUAU--UCGUUAUU    | 8mer       | -0.33           | 97                         | 0.92  | YES<br>PMID:24412084     |                         |

Targetscan analysis - release 6.2 (June 2012) - showing only sites conserved among vertebrates
